# Supplementary material for: Fire-precipitation interactions amplify the quasi-biennial variability of fires over southern Mexico and Central America
Source: Copernicus journal article supplement (doi:10.5194/egusphere-2023-1628), 2023-08-09
Supplement: Supplementary file 1 [file egusphere-2023-1628-supplement.pdf]

1  
2  
3  
4  
5  
6  
7  
8  
9  
10  
11  
12  
13

**Supplementary Information**

**Fire-precipitation interactions amplify the quasi-biennial variability  
of fires over southern Mexico and Central America**

Yawen Liu <sup>1,2</sup>, Yun Qian <sup>3\*</sup>, Philip J. Rasch <sup>3\*</sup>, Kai Zhang <sup>3</sup>, Yuhang Wang <sup>4</sup>, Minghuai Wang <sup>1,2</sup>, Hailong Wang <sup>3</sup>, and Xiu-Qun Yang <sup>1</sup>

<sup>1</sup>School of Atmospheric Sciences, Nanjing University, China

<sup>2</sup>Joint International Research Laboratory of Atmospheric and Earth System Sciences & Institute for Climate and Global Change Research, Nanjing University, China

<sup>3</sup>Pacific Northwest National Laboratory, Richland, Washington, USA

<sup>4</sup>School of Earth and Atmospheric Sciences, Georgia Institute of Technology, Atlanta, Georgia, USA

*Correspondence to:* Yun Qian and Philip J Rasch and ([yun.qian@pnnl.gov](mailto:yun.qian@pnnl.gov) and [Philip.Rasch@pnnl.gov](mailto:Philip.Rasch@pnnl.gov))

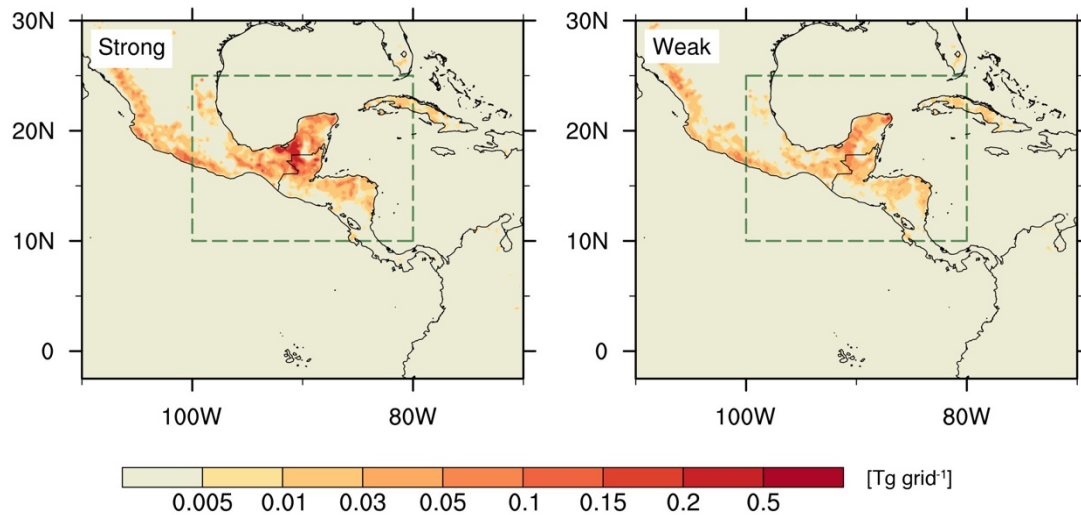

14

15 **Figure S1.** Comparison of fire activities during strong and weak fire years over SMCA.  
 16 Spatial distributions of fire-consumed total dry matter composited in strong and weak  
 17 years respectively.

18

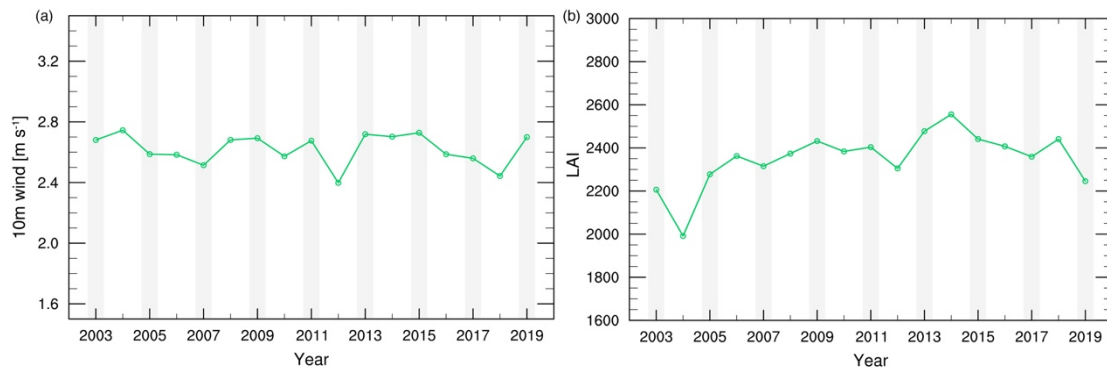

19

20 **Figure S2.** Temporal variations of the regional mean 10m wind speed and leaf area  
 21 index averaged over SMCA in and 10 days previous to the peak burning season (Apr-  
 22 May).

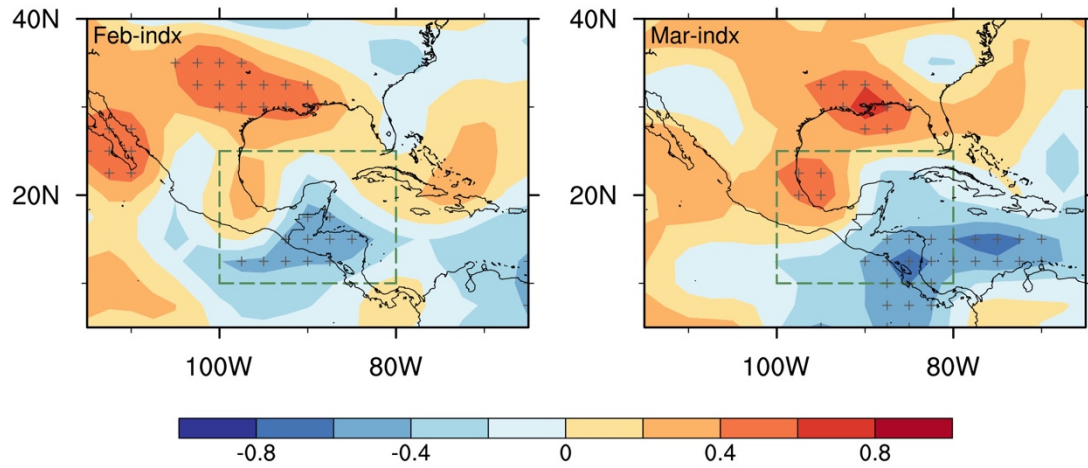

23

24 **Fig. S3** Spatial distributions of correlations of EP/NP index in February and March with  
 25 the mean vertical pressure velocity (reversed signs) in the peak fire months (Apr-May)  
 26 during 2003-2019. Stippling indicates the correlations are statistically significant based  
 27 on the student's T-test.
